# Supplementary material
Source: MDPI journal article supplement (https://www.mdpi.com/2073-4433/11/5/474)
Supplement: s1 [file s1]

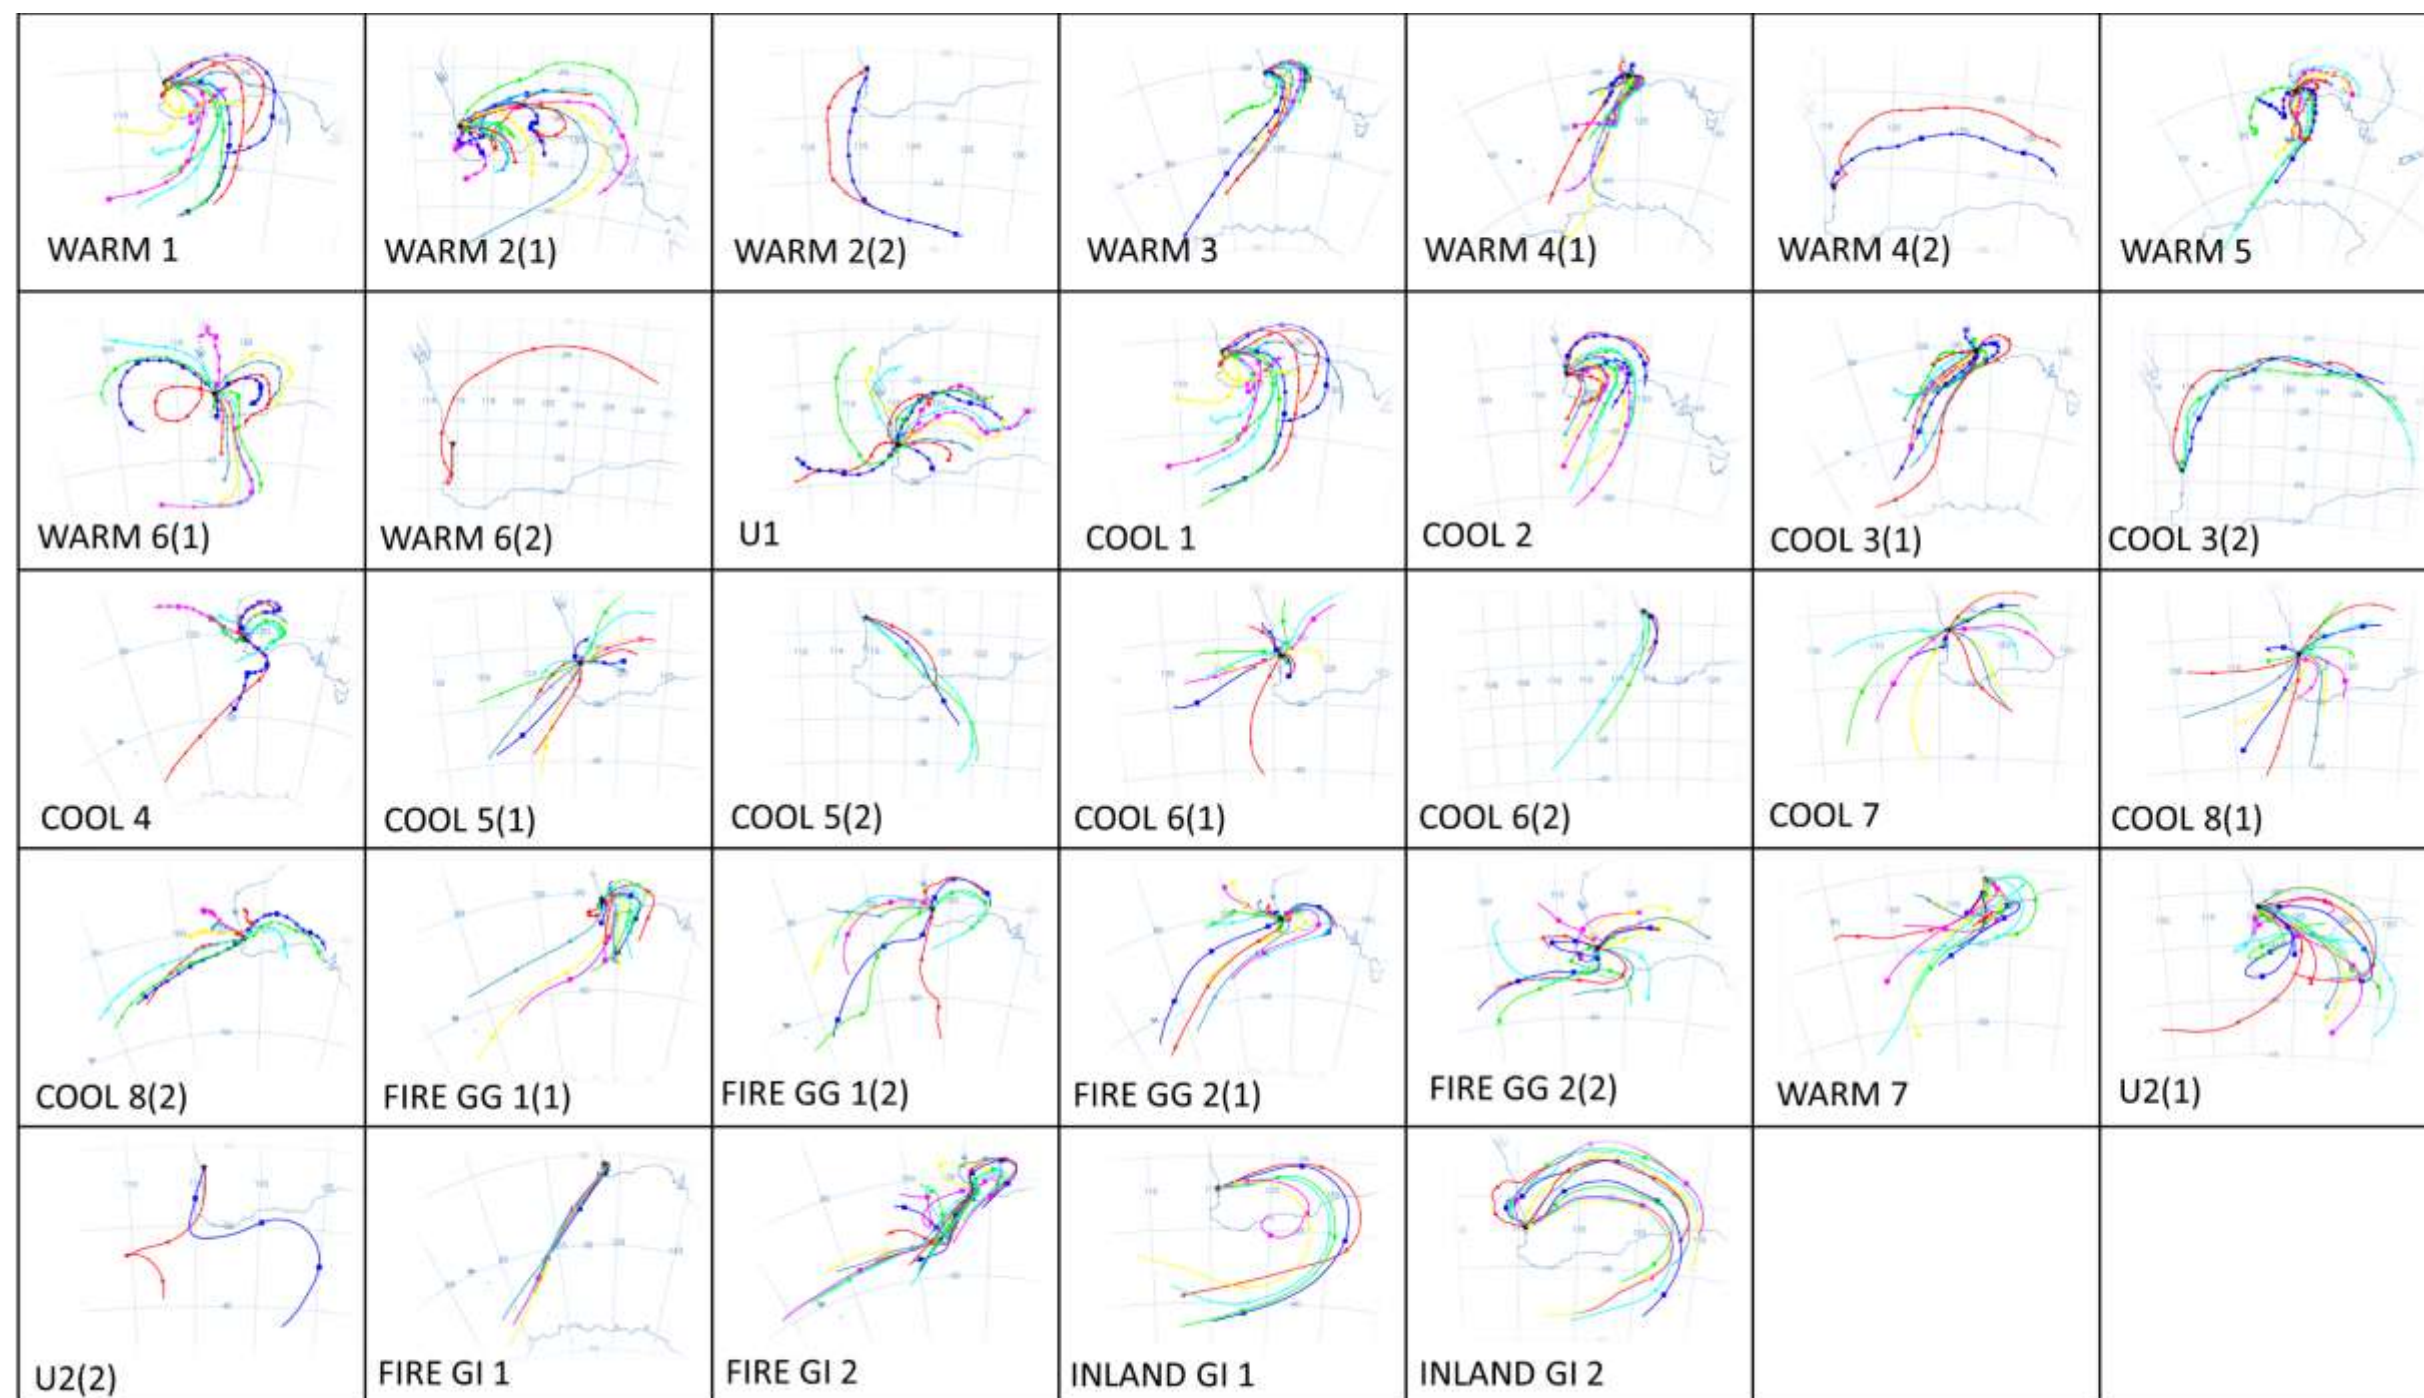

**Figure S1.** Air mass back trajectories of the aerosol samples collected at Gingen and Garden Island (GI) sites. Different colours indicate trajectories run at different time interval of the sampling period. Two figures per sample were present (expressed as 1 and 2 in brackets after sample code) if sampling period exceed maximum time range of back trajectory simulation.

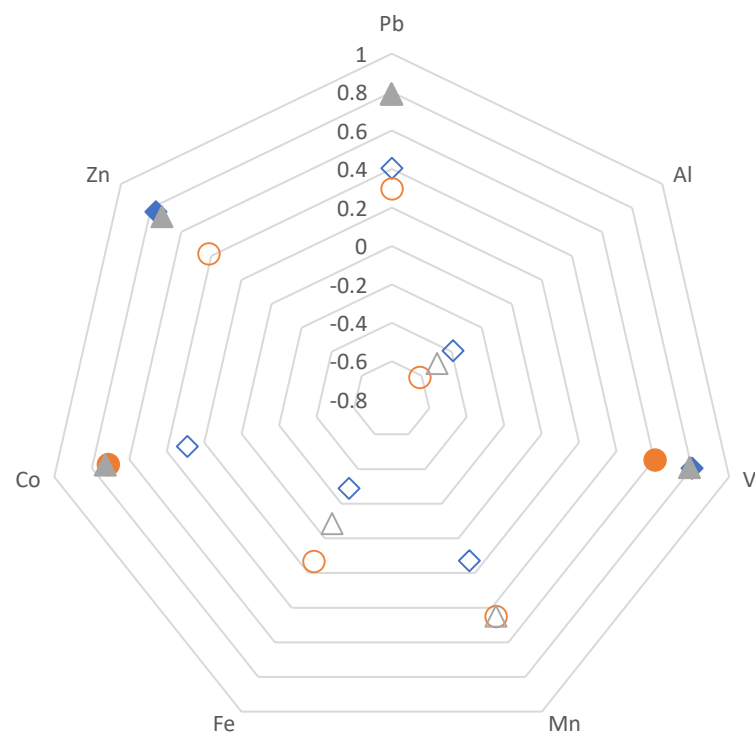

**Figure S2.** Pearson correlation coefficients between fractional solubility and enrichment factor (EF) of BATM. Each vertex of the heptagon represents single elements. Pearson coefficient increases from the complete negative correlation ( $r = -1.0$ ) in the centre of heptagon to the complete positive correlation ( $r = 1.0$ ) on the outermost edge of the heptagon. Contour lines represent specific levels of correlation for each element. Symbol shapes and colours indicate fraction from the leaching protocol: blue diamond = soluble, orange circle = leachable and grey triangle = labile form of BATM. Filled symbols indicate a significant ( $p < 0.05$ ) correlation.

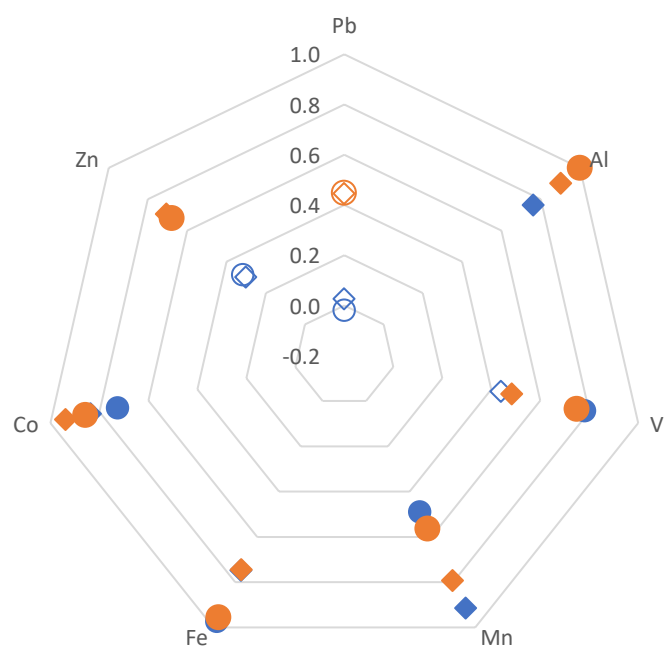

**Figure S3.** Pearson correlation coefficients between atmospheric concentrations of soluble and leachable forms of BATM with soluble, leachable and total Al (mineral dust marker). Each vertex of the heptagon represents a single element. The Pearson coefficient increases from the complete negative correlation ( $r = -1.0$ ) in the middle of heptagon to the complete positive correlation ( $r = 1.0$ ) on the outermost edge of the heptagon. Contour lines represent specific levels of correlation for each element. Symbol colours indicate the fraction of BATM from the leaching protocol (blue = soluble, orange = leachable) while symbol shapes indicate the fraction of Al (total = diamond, soluble/leachable = circle). Filled symbols indicate  $p < 0.05$ .

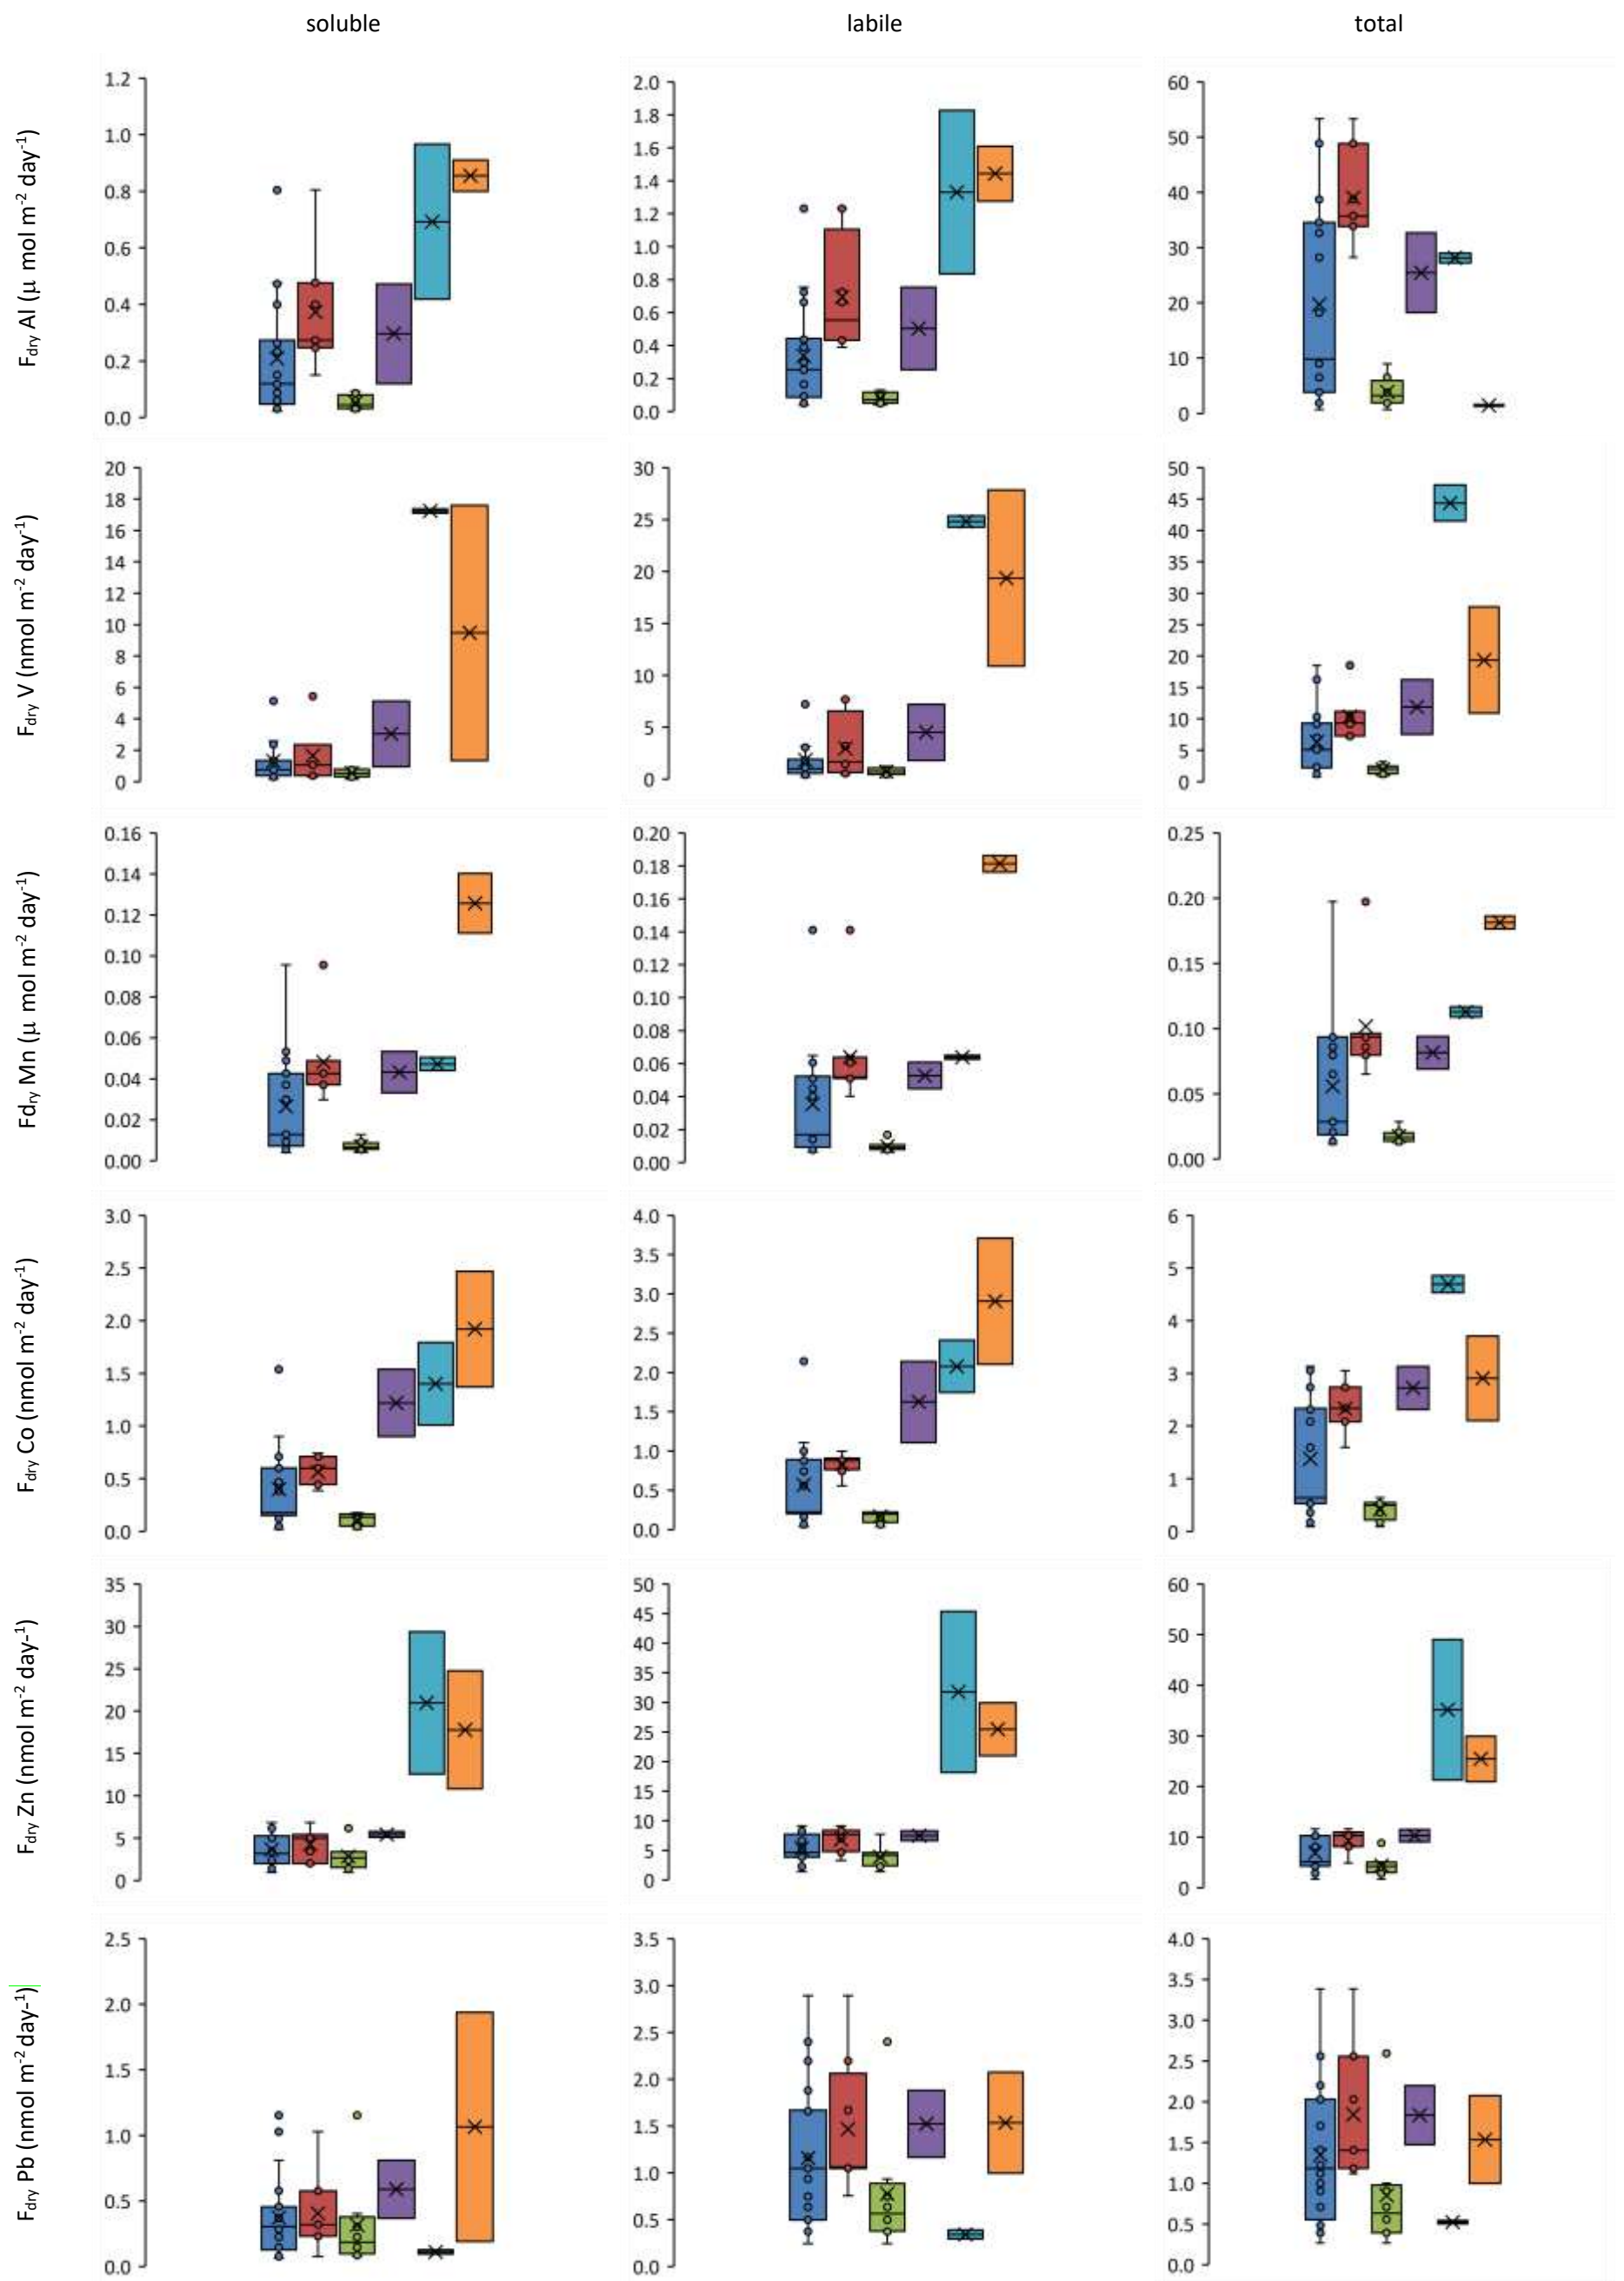

**Figure S4.** Dry deposition fluxes ( $F_{dry}$ ) of soluble, labile and total forms of total Al, Mn, Co, V, Pb and Zn (from top to bottom). Gingin samples in blue, WARM samples in red, COOL samples in green, FIRE GG samples in purple, FIRE GI in marine blue, INLAND GI samples in orange.

**Table S1.** Summary of aerosol samples collected at Gingin and Garden Island (GI). Aerosols collected in Gingin were grouped according to mineral dust (MD) concentrations and bushfires occurrence: high MD-remote bushfires (WARM), low MD-no bushfires (COOL), fresh bushfires (FIRE GG), with two samples not classified into any group (U1, U2). The last four samples are from GI: fresh bushfires (FIRE GI) and aerosols from inland (INLAND GI).

| Seasonal ID | Start (UTC)     | End (UTC)       | Time (min) | Volume (m <sup>3</sup> ) |
|-------------|-----------------|-----------------|------------|--------------------------|
| WARM 1      | 1/04/2015 5:09  | 7/04/2015 1:31  | 8416       | 8991                     |
| WARM 2      | 14/04/2015 7:05 | 23/04/2015 3:34 | 12117      | 12631                    |
| WARM 3      | 23/04/2015 3:36 | 28/04/2015 4:53 | 7273       | 7581                     |
| WARM 4      | 28/04/2015 5:04 | 7/05/2015 6:58  | 12356      | 12880                    |
| WARM 5      | 14/05/2015 6:34 | 21/05/2015 6:18 | 8631       | 8997                     |
| WARM 6      | 12/06/2015 7:18 | 20/06/2015 6:47 | 11488      | 11976                    |
| U 1         | 27/06/2015 7:28 | 4/07/2015 6:33  | 10025      | 10487                    |
| COOL 1      | 04/07/2015 6:40 | 11/07/15 1:53   | 6597       | 7047                     |
| COOL 2      | 11/07/2015 1:59 | 18/07/2015 2:06 | 10088      | 10858                    |
| COOL 3      | 18/07/2015 2:14 | 27/07/2015 7:43 | 13288      | 14195                    |
| COOL 4      | 27/07/2015 7:48 | 1/08/2015 7:41  | 7194       | 7612                     |
| COOL 5      | 01/08/2015 7:47 | 11/08/2015 7:02 | 14335      | 15377                    |
| COOL 6      | 11/08/2015 7:07 | 20/08/2015 5:18 | 12851      | 13760                    |
| COOL 7      | 20/08/2015 5:23 | 26/08/2015 5:22 | 8640       | 9253                     |
| COOL 8      | 26/08/2015 5:33 | 8/09/2015 6:46  | 18795      | 20001                    |
| FIRE GG 1   | 8/09/2015 7:16  | 22/09/2015 7:04 | 16596      | 17635                    |
| FIRE GG 2   | 22/09/2015 7:15 | 9/10/2015 8:26  | 15725      | 17769                    |
| WARM 7      | 13/01/2017 2:13 | 19/01/2017 7:00 | 6567       | 7420,4                   |
| U 2         | 7/02/2017 2:46  | 16/02/2017 6:04 | 14407      | 13541                    |
| FIRE GI 1   | 03/05/2018 5:16 | 04/05/18 4:20   | 1383       | 1490.3                   |
| FIRE GI 2   | 04/05/2018 4:34 | 08/05/2018      | 5549       | 5902.3                   |
| INLAND GI 1 | 10/05/2018 4:48 | 11/05.2018 0:32 | 1184       | 1254.8                   |
| INLAND GI 2 | 11/05/2018 0:50 | 13/05/2018 0:41 | 2245       | 2373.8                   |
